# Supplementary material for: Mapping cell-to-tissue graphs across human placenta histology whole slide images using deep learning with HAPPY
Source: Nat Commun. 2024 Mar 28;15:2710. doi: 10.1038/s41467-024-46986-2 (PMC10978962; doi:10.1038/s41467-024-46986-2)
Supplement: Supplementary file 4 — Source Data [file 41467_2024_46986_MOESM4_ESM.xlsx]

## Sheet: Figure 3
Fig. 3a	Syncytiotrophoblast	Syncytial Knot	Cytotrophoblast	Extra Villus Trophoblast	Fibroblast	Vascular Myocyte	Vascular Endothelial	Mesenchymal Cell	Hofbauer Cell	Leukocyte	Maternal Decidua		Precision	Recall	Counts
Syncytiotrophoblast	602	4	26	1	3	1	6	0	1	2	0		0.895833	0.931889	646
Syncytial Knot	12	196	2	0	0	0	0	0	0	0	0		0.975124	0.933333	210
Cytotrophoblast	44	0	107	3	19	3	14	0	3	0	0		0.660494	0.554404	193
Extra Villus Trophoblast	1	0	1	158	8	3	0	0	1	2	4		0.858696	0.88764	178
Fibroblast	1	0	15	7	401	33	24	2	3	4	1		0.758034	0.816701	491
Vascular Myocyte	0	0	0	2	37	323	17	0	1	0	0		0.875339	0.85	380
Vascular Endothelial	10	1	6	0	31	6	252	0	1	0	0		0.785047	0.820847	307
Mesenchymal Cell	0	0	0	1	11	0	1	32	1	1	0		0.888889	0.680851	47
Hofbauer Cell	0	0	5	3	13	0	4	2	16	1	1		0.571429	0.355556	45
Leukocyte	2	0	0	1	4	0	3	0	1	191	0		0.950249	0.945545	202
Maternal Decidua	0	0	0	8	2	0	0	0	0	0	34		0.85	0.772727	44
Fig. 3b	Terminal Villi	Mature Intermediate Villi	Stem Villi	Villus Sprout	Anchoring Villi	Chorionic Plate	Basal Plate/Septum	Fibrin	Avascular Villi		Precision	Recall	Counts
Terminal Villi	57002	8531	460	712	27	0	8	328	0		0.762518	0.849914	67068
Mature Intermediate Villi	14396	19497	3300	803	35	52	1	424	0		0.51992	0.50631	38508
Stem Villi	1146	7682	10791	33	65	61	0	248	8		0.691509	0.538634	20034
Villus Sprout	1361	909	112	1509	41	1	0	100	0		0.472005	0.374163	4033
Anchoring Villi	92	146	298	33	289	489	49	31	0		0.470684	0.202523	1427
Chorionic Plate	0	0	0	0	0	3720	0	0	0		0.827034	1	3720
Basal Plate/Septum	8	3	15	1	123	77	2706	138	0		0.937305	0.881146	3071
Fibrin	737	628	454	96	27	98	99	1421	14		0.511335	0.397594	3574
Avascular Villi	13	104	175	10	7	0	24	89	12		0.352941	0.0276498	434

## Sheet: Figure 4
Fig. 4a	Terminal Villi	Mature Intermediate Villi	Stem Villi	Villus Sprout	Anchoring Villi	Chorionic Plate	Basal Plate/Septum	Fibrin	Avascular Villi	Not listed	Unclear
Terminal Villi	0.85096	0.06731	0	0.02404	0.01923	0	0	0.00481	0	0	0.03365
Mature Intermediate Villi	0.11957	0.78261	0.02174	0	0.03261	0	0	0	0.01087	0.02174	0.01087
Stem Villi	0	0.14706	0.82353	0	0	0	0	0	0	0	0.02941
Villus Sprout	0	0	0	0.63889	0	0	0	0.13889	0	0.05556	0.16667
Anchoring Villi	0.03704	0.14815	0	0	0.37037	0	0	0	0.03704	0.14815	0.25926
Chorionic Plate	0	0	0.1	0	0	0.875	0	0	0	0.025	0
Basal Plate/Septum	0	0	0	0	0	0	0.9625	0.0125	0	0.0125	0.0125
Fibrin	0.03846	0	0	0.05769	0	0	0	0.78846	0.01923	0	0.09615
Avascular Villi	0.025	0	0	0	0	0	0	0	0.5	0.225	0.25
Not listed	0	0	0	0.05714	0.02857	0	0	0	0.11429	0.57143	0.22857
Unclear	0.14286	0.03571	0	0.14286	0	0	0	0	0.07143	0.07143	0.53571
Fig. 4b	Terminal Villi	Mature Intermediate Villi	Stem Villi	Villus Sprout	Anchoring Villi	Chorionic Plate	Basal Plate/Septum	Fibrin	Avascular Villi
Terminal Villi	0.78481	0.18987	0	0	0.01266	0	0	0.01266	0
Mature Intermediate Villi	0.83784	0.16216	0	0	0	0	0	0	0
Stem Villi	0.13333	0.54667	0.30667	0	0	0	0	0	0.01333
Villus Sprout	0.40984	0	0	0.52459	0	0	0	0.06557	0
Anchoring Villi	0.27273	0.40909	0.10606	0	0.21212	0	0	0	0
Chorionic Plate	0	0	0.10256	0	0	0.89744	0	0	0
Basal Plate/Septum	0	0	0	0	0	0	0.98718	0.01282	0
Fibrin	0.22727	0	0	0.07576	0	0	0	0.63636	0.06061
Avascular Villi	0.125	0.03125	0	0	0.09375	0	0	0	0.75
Fig. 4c	Model PR-AUC	Pathologist Kappa
Terminal Villi	0.88	0.689
Villus Sprout	0.35	0.371
Mature Intermediate Villi	0.53	0.468
Stem Villi	0.7	0.581
Anchoring Villi	0.21	0.051
Chorionic Plate	1	0.82
Basal Plate and Septum	0.95	0.966
Fibrin	0.46	0.689
Avascular Villi	0.06	0.154

## Sheet: Figure 5
Fig. 5a	Syncytiotrophoblast	Syncytial Knot	Cytotrophoblast	Extra Villus Trophoblast	Fibroblast	Vascular Myocyte	Vascular Endothelial	Mesenchymal Cell	Hofbauer Cell	Leukocyte	Maternal Decidua
	0.481	0.008	0.049	0.007	0.183	0.072	0.177	0	0.006	0.014	0.003
	0.429	0.007	0.078	0.017	0.186	0.078	0.187	0	0.012	0.004	0.001
	0.471	0.008	0.046	0.004	0.176	0.043	0.235	0	0.006	0.011	0.001
	0.536	0.005	0.058	0.021	0.145	0.042	0.171	0	0.01	0.009	0.001
	0.491	0.003	0.028	0.006	0.191	0.052	0.199	0	0.006	0.02	0.004
	0.387	0.005	0.038	0.025	0.184	0.084	0.24	0	0.009	0.026	0.002
	0.528	0.011	0.055	0.008	0.116	0.041	0.209	0	0.008	0.021	0.005
	0.506	0.005	0.031	0.007	0.209	0.068	0.145	0	0.004	0.022	0.003
	0.42	0.006	0.047	0.012	0.205	0.065	0.223	0	0.012	0.008	0.002
	0.493	0.007	0.069	0.026	0.146	0.048	0.188	0	0.012	0.01	0.002
	0.449	0.007	0.037	0.01	0.203	0.056	0.212	0	0.012	0.013	0.001
	0.463	0.003	0.064	0.015	0.186	0.063	0.179	0	0.019	0.008	0.001
	0.378	0.01	0.05	0.012	0.14	0.088	0.305	0	0.007	0.01	0
	0.484	0.01	0.057	0.008	0.17	0.038	0.2	0	0.009	0.018	0.006
	0.377	0.011	0.037	0.007	0.163	0.072	0.312	0	0.009	0.012	0.001
	0.384	0.01	0.039	0.006	0.197	0.093	0.257	0	0.005	0.009	0
	0.521	0.008	0.046	0.013	0.16	0.059	0.173	0	0.004	0.015	0.001
	0.505	0.006	0.036	0.008	0.178	0.052	0.186	0	0.006	0.02	0.003
	0.47	0.014	0.047	0.004	0.158	0.079	0.218	0	0.003	0.006	0
	0.39	0.012	0.044	0.005	0.168	0.087	0.274	0	0.009	0.011	0
	0.431	0.004	0.07	0.013	0.236	0.073	0.149	0	0.009	0.014	0.003
	0.518	0.009	0.06	0.004	0.16	0.037	0.194	0	0.006	0.012	0.001
	0.571	0.006	0.04	0.006	0.125	0.03	0.203	0	0.005	0.011	0.001
	0.501	0.006	0.063	0.005	0.198	0.043	0.162	0	0.008	0.012	0.001
	0.401	0.005	0.046	0.01	0.26	0.053	0.199	0	0.007	0.014	0.004
	0.407	0.013	0.064	0.016	0.202	0.092	0.18	0.001	0.003	0.021	0
	0.438	0.005	0.071	0.007	0.279	0.032	0.149	0.001	0.008	0.008	0.002
	0.472	0.008	0.118	0.016	0.285	0.035	0.043	0.003	0.008	0.011	0.002
	0.448	0.009	0.071	0.031	0.262	0.056	0.082	0.002	0.009	0.025	0.005
	0.422	0.005	0.105	0.013	0.255	0.016	0.159	0.001	0.011	0.009	0.004
Fig. 5b	Terminal Villi	Mature Intermediate Villi	Stem Villi	Villus Sprout	Anchoring Villi	Chorionic Plate	Basal Plate/Septum	Fibrin	Avascular Villi
	0.47	0.248	0.211	0.004	0.025	0.021	0.007	0.014	0.001
	0.371	0.518	0.062	0.007	0.008	0.015	0.004	0.014	0.001
	0.63	0.239	0.08	0.002	0.017	0.004	0.003	0.025	0.001
	0.469	0.428	0.036	0.008	0.02	0.009	0.016	0.012	0.002
	0.379	0.336	0.148	0.002	0.078	0.03	0.006	0.019	0.003
	0.498	0.263	0.097	0.001	0.061	0.031	0.018	0.029	0.002
	0.547	0.234	0.048	0.012	0.096	0.008	0.011	0.044	0.001
	0.35	0.405	0.132	0.003	0.065	0.019	0.008	0.016	0.001
	0.483	0.342	0.117	0.001	0.013	0.026	0.014	0.003	0.001
	0.485	0.341	0.079	0.017	0.019	0.015	0.022	0.021	0.001
	0.549	0.306	0.09	0.003	0.013	0.014	0.011	0.014	0
	0.362	0.528	0.077	0.005	0.008	0.01	0.001	0.006	0.003
	0.603	0.226	0.097	0.001	0.005	0.027	0.005	0.037	0.001
	0.629	0.174	0.092	0.003	0.066	0.01	0.014	0.012	0.001
	0.658	0.185	0.114	0.001	0.004	0.009	0.006	0.023	0
	0.523	0.268	0.159	0.005	0.006	0.004	0.004	0.03	0
	0.507	0.344	0.09	0.004	0.016	0.012	0.009	0.019	0.001
	0.495	0.276	0.12	0.004	0.059	0.025	0.006	0.014	0.002
	0.426	0.416	0.127	0.003	0.005	0.006	0.002	0.016	0
	0.572	0.263	0.12	0.002	0.003	0.017	0.003	0.019	0
	0.227	0.442	0.201	0.002	0.058	0.049	0.004	0.014	0.003
	0.636	0.217	0.105	0.005	0.015	0.008	0.001	0.012	0.001
	0.555	0.275	0.116	0.005	0.011	0.005	0.005	0.028	0.001
	0.544	0.321	0.07	0.002	0.031	0.014	0.003	0.011	0.002
	0.296	0.317	0.088	0.002	0.22	0.056	0.008	0.009	0.004
	0.402	0.3	0.156	0.031	0.008	0.048	0.015	0.038	0.002
	0.509	0.296	0.153	0.004	0.007	0.015	0.004	0.008	0.005
	0.317	0.439	0.156	0.039	0.001	0.013	0.005	0.022	0.008
	0.332	0.322	0.207	0.013	0.008	0.018	0.013	0.061	0.027
	0.721	0.179	0.063	0.001	0.01	0.006	0.007	0.008	0.005

## Sheet: Figure 6
Fig. 6a	Chorionic Plate	Stem Villi	Mature Intermediate Villi	Terminal Villi	Villus Sprout
Syncytiotrophoblast	6.32278	21.2611	48.8347	51.9565	82.0071
Syncytial Knot	0.043319	0.346154	0.827725	0.798383	1.44081
Cytotrophoblast	1.26301	2.51241	5.68481	6.54349	7.61705
Extra Villus Trophoblast	4.03793	1.48912	0.728378	0.362182	0.479338
Fibroblast	44.102	34.7718	20.5282	13.3063	2.17213
Vascular Myocyte	33.3927	24.8556	4.78856	1.21597	0.464718
Vascular Endothelial	4.43363	12.1733	16.7924	23.7918	4.65429
Mesenchymal Cell	0.469749	0.047799	0.0207753	0.0197923	0.0203881
Hofbauer Cell	0.391945	0.547655	0.774894	0.907338	0.142328
Leukocyte	4.51866	1.84963	0.920218	1.02	0.944281
Maternal Decidua	1.02423	0.14545	0.0993346	0.0782542	0.0575412

## Sheet: Figure 7
Fig. 7a	Syncytiotrophoblast	Syncytial Knot	Cytotrophoblast	Extra Villus Trophoblast	Fibroblast	Vascular Myocyte	Vascular Endothelial	Mesenchymal Cell	Hofbauer Cell	Leukocyte	Maternal Decidua
	0.481	0.008	0.049	0.007	0.183	0.072	0.177	0	0.006	0.014	0.003
	0.429	0.007	0.078	0.017	0.186	0.078	0.187	0	0.012	0.004	0.001
	0.471	0.008	0.046	0.004	0.176	0.043	0.235	0	0.006	0.011	0.001
	0.536	0.005	0.058	0.021	0.145	0.042	0.171	0	0.01	0.009	0.001
	0.491	0.003	0.028	0.006	0.191	0.052	0.199	0	0.006	0.02	0.004
	0.387	0.005	0.038	0.025	0.184	0.084	0.24	0	0.009	0.026	0.002
	0.528	0.011	0.055	0.008	0.116	0.041	0.209	0	0.008	0.021	0.005
	0.506	0.005	0.031	0.007	0.209	0.068	0.145	0	0.004	0.022	0.003
	0.42	0.006	0.047	0.012	0.205	0.065	0.223	0	0.012	0.008	0.002
	0.493	0.007	0.069	0.026	0.146	0.048	0.188	0	0.012	0.01	0.002
	0.449	0.007	0.037	0.01	0.203	0.056	0.212	0	0.012	0.013	0.001
	0.463	0.003	0.064	0.015	0.186	0.063	0.179	0	0.019	0.008	0.001
	0.378	0.01	0.05	0.012	0.14	0.088	0.305	0	0.007	0.01	0
	0.484	0.01	0.057	0.008	0.17	0.038	0.2	0	0.009	0.018	0.006
	0.377	0.011	0.037	0.007	0.163	0.072	0.312	0	0.009	0.012	0.001
	0.384	0.01	0.039	0.006	0.197	0.093	0.257	0	0.005	0.009	0
	0.521	0.008	0.046	0.013	0.16	0.059	0.173	0	0.004	0.015	0.001
	0.505	0.006	0.036	0.008	0.178	0.052	0.186	0	0.006	0.02	0.003
	0.47	0.014	0.047	0.004	0.158	0.079	0.218	0	0.003	0.006	0
	0.39	0.012	0.044	0.005	0.168	0.087	0.274	0	0.009	0.011	0
	0.431	0.004	0.07	0.013	0.236	0.073	0.149	0	0.009	0.014	0.003
	0.518	0.009	0.06	0.004	0.16	0.037	0.194	0	0.006	0.012	0.001
	0.571	0.006	0.04	0.006	0.125	0.03	0.203	0	0.005	0.011	0.001
	0.501	0.006	0.063	0.005	0.198	0.043	0.162	0	0.008	0.012	0.001
	0.401	0.005	0.046	0.01	0.26	0.053	0.199	0	0.007	0.014	0.004
	0.407	0.013	0.064	0.016	0.202	0.092	0.18	0.001	0.003	0.021	0
	0.438	0.005	0.071	0.007	0.279	0.032	0.149	0.001	0.008	0.008	0.002
	0.472	0.008	0.118	0.016	0.285	0.035	0.043	0.003	0.008	0.011	0.002
	0.448	0.009	0.071	0.031	0.262	0.056	0.082	0.002	0.009	0.025	0.005
	0.422	0.005	0.105	0.013	0.255	0.016	0.159	0.001	0.011	0.009	0.004
Fig. 7b	Syncytiotrophoblast	Syncytial Knot	Cytotrophoblast	Extra Villus Trophoblast	Fibroblast	Vascular Myocyte	Vascular Endothelial	Mesenchymal Cell	Hofbauer Cell	Leukocyte	Maternal Decidua
	0.286	0.006	0.067	0.1	0.254	0.041	0.185	0.002	0.013	0.036	0.01
	0.541	0.012	0.042	0.035	0.189	0.06	0.056	0.001	0.005	0.056	0.004
	0.323	0.013	0.018	0.079	0.161	0.109	0.049	0.001	0.006	0.236	0.004
	0.454	0.005	0.093	0.018	0.258	0.023	0.124	0.001	0.011	0.01	0.003
	0.404	0.007	0.064	0.047	0.268	0.055	0.071	0.004	0.008	0.065	0.006
	0.325	0.006	0.03	0.062	0.247	0.092	0.099	0.015	0.006	0.105	0.013
	0.136	0.002	0.022	0.035	0.394	0.122	0.084	0.025	0.003	0.175	0.001
	0.224	0.007	0.043	0.023	0.362	0.068	0.128	0.03	0.004	0.11	0.001
	0.273	0.006	0.056	0.026	0.34	0.048	0.099	0.042	0.006	0.102	0.002
	0.368	0.006	0.053	0.052	0.316	0.066	0.082	0.002	0.009	0.043	0.002
	0.313	0.012	0.075	0.038	0.375	0.037	0.091	0.016	0.006	0.035	0.002
	0.274	0.003	0.049	0.129	0.187	0.167	0.06	0.002	0.006	0.115	0.007
p values	0.00117733	0.697866	0.549995	0.00115013	0.00244259	0.230313	2.16995e-07	0.0158319	0.275992	0.00168633	0.0402989
Fig. 7c	Terminal Villi	Mature Intermediate Villi	Stem Villi	Villus Sprout	Anchoring Villi	Chorionic Plate	Basal Plate/Septum	Fibrin	Avascular Villi
	0.47	0.248	0.211	0.004	0.025	0.021	0.007	0.014	0.001
	0.371	0.518	0.062	0.007	0.008	0.015	0.004	0.014	0.001
	0.63	0.239	0.08	0.002	0.017	0.004	0.003	0.025	0.001
	0.469	0.428	0.036	0.008	0.02	0.009	0.016	0.012	0.002
	0.379	0.336	0.148	0.002	0.078	0.03	0.006	0.019	0.003
	0.498	0.263	0.097	0.001	0.061	0.031	0.018	0.029	0.002
	0.547	0.234	0.048	0.012	0.096	0.008	0.011	0.044	0.001
	0.35	0.405	0.132	0.003	0.065	0.019	0.008	0.016	0.001
	0.483	0.342	0.117	0.001	0.013	0.026	0.014	0.003	0.001
	0.485	0.341	0.079	0.017	0.019	0.015	0.022	0.021	0.001
	0.549	0.306	0.09	0.003	0.013	0.014	0.011	0.014	0
	0.362	0.528	0.077	0.005	0.008	0.01	0.001	0.006	0.003
	0.603	0.226	0.097	0.001	0.005	0.027	0.005	0.037	0.001
	0.629	0.174	0.092	0.003	0.066	0.01	0.014	0.012	0.001
	0.658	0.185	0.114	0.001	0.004	0.009	0.006	0.023	0
	0.523	0.268	0.159	0.005	0.006	0.004	0.004	0.03	0
	0.507	0.344	0.09	0.004	0.016	0.012	0.009	0.019	0.001
	0.495	0.276	0.12	0.004	0.059	0.025	0.006	0.014	0.002
	0.426	0.416	0.127	0.003	0.005	0.006	0.002	0.016	0
	0.572	0.263	0.12	0.002	0.003	0.017	0.003	0.019	0
	0.227	0.442	0.201	0.002	0.058	0.049	0.004	0.014	0.003
	0.636	0.217	0.105	0.005	0.015	0.008	0.001	0.012	0.001
	0.555	0.275	0.116	0.005	0.011	0.005	0.005	0.028	0.001
	0.544	0.321	0.07	0.002	0.031	0.014	0.003	0.011	0.002
	0.296	0.317	0.088	0.002	0.22	0.056	0.008	0.009	0.004
	0.402	0.3	0.156	0.031	0.008	0.048	0.015	0.038	0.002
	0.509	0.296	0.153	0.004	0.007	0.015	0.004	0.008	0.005
	0.317	0.439	0.156	0.039	0.001	0.013	0.005	0.022	0.008
	0.332	0.322	0.207	0.013	0.008	0.018	0.013	0.061	0.027
	0.721	0.179	0.063	0.001	0.01	0.006	0.007	0.008	0.005
Fig. 7d	Terminal Villi	Mature Intermediate Villi	Stem Villi	Villus Sprout	Anchoring Villi	Chorionic Plate	Basal Plate/Septum	Fibrin	Avascular Villi
	0.459	0.093	0.142	0.004	0.017	0.012	0.064	0.158	0.052
	0.17	0.425	0.104	0.045	0.001	0.023	0.013	0.151	0.069
	0.017	0.031	0.102	0.001	0.022	0.027	0.057	0.595	0.148
	0.619	0.235	0.092	0.004	0.007	0.003	0.006	0.022	0.013
	0.311	0.233	0.188	0.023	0.005	0.03	0.036	0.119	0.055
	0.248	0.131	0.169	0.021	0.014	0.042	0.095	0.229	0.05
	0.147	0.216	0.217	0.02	0.008	0.093	0.056	0.198	0.045
	0.296	0.256	0.165	0.042	0.01	0.024	0.038	0.153	0.016
	0.264	0.261	0.161	0.044	0.009	0.023	0.039	0.184	0.016
	0.299	0.24	0.236	0.007	0.003	0.029	0.011	0.099	0.076
	0.23	0.424	0.152	0.024	0.016	0.008	0.02	0.113	0.012
	0.038	0.054	0.041	0.013	0.029	0.029	0.217	0.519	0.061
p values	0.000569611	0.0261999	0.077715	0.0111821	0.0223152	0.160516	0.0170267	0.00249056	0.00104207

## Sheet: Figure 8
Fig. 8a	Syncytiotrophoblast	Syncytial Knot	Cytotrophoblast	Extra Villus Trophoblast	Fibroblast	Vascular Myocyte	Vascular Endothelial	Mesenchymal Cell	Hofbauer Cell	Leukocyte	Maternal Decidua	Total
	1629.9	26.0715	166.833	23.6194	621.18	244.316	600.46	0.0578908	20.055	48.7027	9.66776	3390.87
	1589.41	25.0663	289.483	62.6019	688.818	290.3	691.398	0.127712	43.9351	16.3076	3.99157	3701.44
	2087.91	36.6907	202.299	17.7117	779.592	189.086	1042.33	0.123391	28.7449	48.8215	2.93053	4436.24
	1733.13	16.4866	188.132	68.6594	469.336	136.656	550.866	0.226542	33.6585	28.9719	4.69792	3230.82
	1503.77	9.5808	86.2237	17.3285	583.688	158.558	610.2	0.13617	17.957	61.9016	11.9236	3061.26
	1031.72	13.2936	101.516	67.4163	489.568	224.94	640.823	0.141672	24.3007	68.0381	5.47799	2667.23
	1733.03	34.8052	180.656	24.9634	380.352	133.61	685.172	0.34173	25.4555	69.3609	15.6136	3283.36
	1601.8	14.6264	98.857	21.5512	662.81	214.133	459.88	0.0672634	13.3955	70.9225	9.89781	3167.94
	1368	18.5651	152.194	39.9578	667.403	210.903	727.48	0.755617	39.3435	26.9346	6.08133	3257.62
	1474.36	19.8264	206.305	77.1895	438.005	142.74	563.979	0.119562	34.443	29.2211	7.09005	2993.28
	1758.96	26.4527	145.105	37.6234	794.572	219.493	830.213	0.553005	47.7453	49.8467	4.0541	3914.62
	1439.25	10.7069	198.868	45.307	576.696	194.289	555.363	0.129939	58.1995	25.5459	2.96	3107.32
	1428.82	36.5833	188.237	45.8929	529.269	331.96	1154.34	0.1296	26.1144	39.2257	1.3464	3781.92
	1841.09	36.9566	217.417	29.4201	646.203	144.989	762.14	0.0998204	34.2499	68.4039	23.4348	3804.41
	1695.43	48.0759	167.921	31.3893	733.171	324.453	1405.34	0.762053	38.9131	52.8901	2.47365	4500.81
	1893.97	50.7019	192.285	28.3627	973.163	457.687	1266.83	0.296517	23.6454	43.0366	1.64432	4931.63
	1906.21	27.9781	166.494	48.0925	586.687	215.758	631.71	0.21321	16.2691	54.3935	4.53258	3658.34
	1592.14	18.5664	112.811	24.8436	562.134	164.719	585.363	0.194964	19.669	62.9575	8.75103	3152.15
	2184.12	66.5707	217.307	18.6146	733.71	368.553	1013.49	0.21396	15.0248	26.0477	1.89395	4645.54
	1452.34	45.6676	163.222	20.0344	626.621	324.652	1021.85	0.338536	32.2564	39.6478	1.41491	3728.04
	1227.64	10.9824	198.889	36.8922	672.281	207.174	423.641	0.114346	24.2725	40.0107	8.91898	2850.82
	1987.32	33.3998	229.166	15.752	612.584	141.089	743.304	0.0663914	22.1674	45.1191	3.29498	3833.26
	2390.91	24.4906	165.416	27.1647	523.363	127.021	851.145	0.0791885	21.9382	47.6014	6.14929	4185.28
	1937.36	23.7436	244.342	19.9639	765.427	167.576	624.904	0.085417	31.1013	45.1951	5.21518	3864.91
	1133.87	13.4981	129.925	29.273	736.605	150.194	563.218	0.0983185	20.057	39.9794	11.4645	2828.18
	1561.97	50.3338	246.045	61.1887	775.505	352.507	691.995	5.03987	11.6334	78.9853	1.05509	3836.26
	1809.2	20.3186	291.509	29.0774	1154.79	132.951	613.929	5.68316	33.9899	32.716	9.65609	4133.82
	1842.84	30.0736	460.055	60.7413	1110.27	134.731	167.495	11.7466	32.4229	41.5231	9.71091	3901.61
	1587.48	30.4137	253.078	111.326	926.73	197.176	291.055	8.12949	32.4646	87.498	16.994	3542.34
	1946.61	23.9602	483.278	57.6896	1177.85	75.7907	734.123	2.37473	48.5428	42.9294	17.4297	4610.58
Fig. 8b	Syncytiotrophoblast	Syncytial Knot	Cytotrophoblast	Extra Villus Trophoblast	Fibroblast	Vascular Myocyte	Vascular Endothelial	Mesenchymal Cell	Hofbauer Cell	Leukocyte	Maternal Decidua	Total
	683.484	14.0411	160.878	237.831	606.722	97.7143	440.897	5.34426	30.3491	85.726	23.6248	2386.61
	1608.38	34.4326	126.183	103.88	561.488	177.999	165.221	2.31603	13.5196	166.099	11.7594	2971.28
	581.723	24.1246	31.819	143.006	290.008	197.021	89.1399	1.86099	9.99929	425.382	7.73423	1801.82
	2047.68	23.1721	421.01	82.06	1162.57	101.752	561.718	2.51876	48.6838	46.6814	14.7411	4512.59
	1145.04	18.9279	182.243	134.291	759.898	155.858	202.237	12.1691	23.8797	183.197	16.4813	2834.23
	721.431	12.3055	67.4581	138.491	547.169	204.974	218.859	33.3755	13.2407	233.469	28.4373	2219.21
	234.064	3.54709	37.32	60.8612	676.488	209.751	143.967	43.7501	5.8018	301.355	1.89682	1718.8
	492.43	14.6219	94.4423	50.4429	794.96	150.272	281.974	65.5232	8.29307	241.368	2.20618	2196.53
	638.826	13.2867	132.103	60.9726	797.197	111.302	231.785	97.8159	13.8478	239.32	5.69599	2342.15
	869.979	14.3142	124.619	123.101	747.383	155.416	194.305	5.04497	20.4066	102.791	5.87212	2363.23
	963.154	36.9272	230.168	117.673	1150.61	112.849	279.865	49.5591	18.4841	106.222	6.76856	3072.28
	558.149	5.50272	99.3303	261.751	381.59	339.627	123.001	4.85568	12.7047	234.676	15.1691	2036.36
p values adjusted	0.0019	0.1676	1.0299	0.0101	11.2863	1.058	0	0.1933	0.1606	0.0056	1.3695	0.0029
Fig. 8c	Terminal Villi	Mature Intermediate Villi	Stem Villi	Villus Sprout	Anchoring Villi	Chorionic Plate	Basal Plate/Septum	Fibrin	Avascular Villi
	1593.54	840.942	716.494	12.9345	83.3462	69.7046	22.5939	48.0287	3.2791
	1374.59	1918.66	229.477	24.6228	28.7351	55.8935	13.4074	53.0909	2.96523
	2796.5	1059.57	352.928	7.3983	76.3017	16.3441	13.9817	109.9	3.32126
	1515.95	1383.23	115.384	26.3271	65.1593	28.8558	52.0453	38.1441	5.73436
	1161.71	1027.27	452.696	5.33508	238.354	90.3262	19.5771	57.799	8.19116
	1326.96	701.82	257.894	3.57722	161.597	83.6141	49.235	76.2393	6.29261
	1795.36	768.592	157.127	38.8376	316.51	24.9429	35.3725	144.934	1.68131
	1110	1282.73	418.059	9.83391	205.665	60.3319	26.8179	50.007	4.49319
	1574.81	1113.33	380.275	3.29646	42.1626	85.6716	46.5721	9.38421	2.11701
	1450.94	1021.95	237.263	50.7244	58.1253	44.0767	64.9045	61.9035	3.3896
	2149.8	1196.71	351.436	11.4491	50.1861	55.1899	42.711	56.151	0.983967
	1124.35	1642.02	239.396	14.9689	23.4591	31.6946	3.55512	20.0625	7.81451
	2278.63	853.677	366.826	4.11121	17.6688	100.998	17.784	140.199	2.0268
	2393.1	660.565	350.105	9.79776	249.643	39.3292	51.5457	46.9809	3.33631
	2961.13	832.416	514.812	5.32228	16.7198	38.7377	25.5681	105.508	0.595732
	2579.3	1322.54	785.669	24.5815	30.3991	19.722	22.0844	145.921	1.40907
	1853.24	1256.68	329.13	13.4222	57.6142	42.2004	33.2331	67.6953	5.12706
	1561.62	870.9	377.023	12.3147	185.28	77.8483	17.7386	43.3908	6.03431
	1976.85	1930.93	590.7	12.4731	23.2926	27.2892	8.35502	74.1888	1.46338
	2132.96	981.225	447.762	8.82364	11.5146	62.985	11.5883	70.8495	0.338536
	646.309	1258.7	574.282	5.56137	164.934	141.061	11.5853	39.0959	9.29321
	2439.2	832.895	401.894	18.4593	57.0917	31.0368	3.09089	47.6248	1.96715
	2320.95	1151.56	484.243	20.0225	47.3212	20.2387	20.525	117.235	3.17972
	2104.18	1242.1	272.245	9.10877	117.928	55.6207	12.9241	43.0027	7.80142
	835.837	896.843	249.569	5.05564	622.253	157.563	23.4955	26.8332	10.7297
	1543.59	1150.23	598.191	119.417	31.5811	183.764	55.6878	146.037	7.75443
	2102.15	1224.28	632.242	14.8114	29.6334	62.6238	17.0706	31.2591	19.7521
	1238.31	1713.18	607.083	152.838	2.44836	50.9369	17.6722	86.793	32.3514
	1177	1139.95	731.74	45.1997	27.1507	63.2281	46.7527	214.873	96.4425
	3321.94	823.483	292.133	6.68609	44.4074	26.8181	32.1285	38.3437	24.6399
Fig. 8d	Terminal Villi	Mature Intermediate Villi	Stem Villi	Villus Sprout	Anchoring Villi	Chorionic Plate	Basal Plate/Septum	Fibrin	Avascular Villi
	1094.57	222.819	339.662	9.45375	39.455	28.1166	151.562	376.992	123.984
	503.782	1263.46	308.823	133.251	2.86291	68.8891	37.5525	448.173	204.486
	30.3735	55.3347	183.453	2.39027	39.4508	49.0802	102.184	1072.81	266.737
	2792.4	1058.4	415.114	18.8038	31.669	12.1749	25.2719	99.3041	59.4518
	881.844	659.614	533.984	64.0915	15.4472	83.7016	103.163	336.315	156.066
	550.995	290.338	375.667	45.8749	31.3512	93.6829	210.642	508.673	111.987
	252.949	371.16	372.532	34.0035	14.3872	160.188	95.7157	340.016	77.853
	650.224	563.289	361.925	92.4016	21.4983	52.9929	83.0867	336.259	34.8564
	618.994	610.449	377.016	102.208	21.2858	54.3043	90.5747	430.336	36.9843
	706.605	566.939	556.724	16.5581	7.70999	69.3359	25.9181	234.338	179.103
	706.281	1303.87	468.234	74.6702	50.6767	24.3027	60.0118	346.493	37.743
	76.4248	109.047	83.6887	26.9285	58.2512	59.5228	442.311	1056.19	123.991
p values adjusted	0.0022	0.0085	2.7298	0.4448	0.0326	8.2615	0.1655	0.0074	0.003

## Sheet: Table 1
Table 1	F1 Score
Nuclei Detection	0.884
	Accuracy	Top-2 Accuracy	ROC AUC
Cell Classification	0.8429	0.949	0.977
Tissue Classification	0.6834	0.9142	0.888

## Sheet: Supplementary Figure 6
Supplementary Fig. 6a	Syncytiotrophoblast	Syncytial Knot	Cytotrophoblast	Extra Villus Trophoblast	Fibroblast	Vascular Myocyte	Vascular Endothelial	Mesenchymal Cell	Hofbauer Cell	Leukocyte	Maternal Decidua	Total
Proportion	0.028	0.034	0.481	0.021	0.119	0.01	0.239	0	0.006	0	0.061	1
Density	103.252	121.595	1746.64	76.9989	430.071	36.6035	866.559	0.0909712	23.3134	1.0379	222.04	3628.21

## Sheet: Supplementary Table 2
Supplementary Table 2
Model Type	Seen Institute	Unseen Institute	Unseen Institute
UoT with augs	0.895 UoT	0.868 HMC	0.883 NUH
UoT without augs	0.891 UoT	0.883 HMC	0.823 NUH
HMC with augs	0.872 HMC	0.851 UoT	0.873 NUH
HMC without augs	0.856 HMC	0.86 UoT	0.836 NUH
NUH with augs	0.857 NUH	0.811 UoT	0.824 HMC
NUH without augs	0.831 NUH	0.748 UoT	0.795 HMC

## Sheet: Supplementary Table 3
Supplementary Table 3
Model Type	Seen Institute	Unseen Institute	Unseen Institute
UoT with augs	0.978 UoT	0.871 HMC	0.844 NUH
UoT without augs	0.981 UoT	0.791 HMC	0.720 NUH
HMC with augs	0.971 HMC	0.857 UoT	0.875 NUH
HMC without augs	0.972 HMC	0.794 UoT	0.697 NUH
NUH with augs	0.959 NUH	0.791 UoT	0.808 HMC
NUH without augs	0.964 NUH	0.544 UoT	0.596 HMC

[truncated: 1 more sheets: Supplementary Table 7]
